# Supplementary material for: Photodynamic Inactivation of Legionella pneumophila Biofilm Formation by Cationic Tetra- and Tripyridylporphyrins in Waters of Different Hardness
Source: MDPI journal article supplement (doi:10.3390/ijms22169095), 2021-08-23
Supplement: s1 [file s1]

# Photodynamic Inactivation of *Legionella Pneumophila* Biofilm Formation by Cationic Tetra- and Tripyridylporphyrins in Waters of Different Hardness

Martina Mušković<sup>1</sup>, Iva Čavar<sup>1</sup>, Andrija Lesar<sup>2</sup>, Martin Lončarić<sup>3</sup>, Nela Malatesti<sup>1,\*</sup> and Ivana Gobin<sup>4</sup>

<sup>1</sup> Department of Biotechnology, University of Rijeka, Radmile Matejčić 2, Rijeka 51000, Croatia; martina.muskovic@biotech.uniri.hr (M.M.); iva.cavar@student.uniri.hr (I.Č.)

<sup>2</sup> Bioinstitut d.o.o., R. Steinera 7, Čakovec 40000, Croatia; lesar@bioinstitut.hr

<sup>3</sup> Photonics and Quantum Optics Unit, Center of Excellence for Advanced Materials and Sensing Devices, Ruđer Bošković Institute, Bijenička cesta 54, Zagreb 10000, Croatia; martin.loncaric@irb.hr

<sup>4</sup> Department of Microbiology and Parasitology, Faculty of Medicine, University of Rijeka, Braće Branchetta 20, Rijeka 51000, Croatia; ivana.gobin@medri.uniri.hr

\* Correspondence: nela.malatesti@biotech.uniri.hr; Tel.: +385-51-584-585; Fax: +385-51-584-599

**Table S1.** Absorption and fluorescence properties of TMPyP3 (A), TMPyP3-CH<sub>3</sub> (B) and TMPyP3-C<sub>17</sub>H<sub>35</sub> (C) in waters of different hardness (DEMI, HW and SW). Fluorescence was measured at concentration 1  $\mu$ M after excitation at Soret band wavelength.

| A    | Absorbance properties $\lambda_{\max}$ (nm) ( $\epsilon \times 10^3 \text{ M}^{-1}\text{cm}^{-1}$ ) |            |            |            |            |  | Fluorescence properties |              |
|------|-----------------------------------------------------------------------------------------------------|------------|------------|------------|------------|--|-------------------------|--------------|
|      | Soret                                                                                               | $Q_y(1-0)$ | $Q_y(0-0)$ | $Q_x(1-0)$ | $Q_x(0-0)$ |  | $\lambda_{\max}$ (nm)   | Stokes shift |
| DEMI | 416 (247.2)                                                                                         | 514 (14.4) | 550 (2.3)  | 580 (3.0)  | 650 (0.7)  |  | 656, 708                | 6            |
| HW   | 417 (237.7)                                                                                         | 514 (12.6) | 544 (3.9)  | 580 (5.0)  | 650 (0.7)  |  | 657, 708                | 7            |
| SW   | 416 (250.6)                                                                                         | 514 (13.9) | 550 (3.7)  | 581 (5.9)  | 650 (0.5)  |  | 656, 707                | 6            |

  

| B    | Absorbance properties $\lambda_{\max}$ (nm) ( $\epsilon \times 10^3 \text{ M}^{-1}\text{cm}^{-1}$ ) |            |            |            |            |  | Fluorescence properties |              |
|------|-----------------------------------------------------------------------------------------------------|------------|------------|------------|------------|--|-------------------------|--------------|
|      | Soret                                                                                               | $Q_y(1-0)$ | $Q_y(0-0)$ | $Q_x(1-0)$ | $Q_x(0-0)$ |  | $\lambda_{\max}$ (nm)   | Stokes shift |
| DEMI | 418 (255.3)                                                                                         | 516 (14.9) | 553 (3.7)  | 581 (5.6)  | 648 (0.9)  |  | 655, 704                | 7            |
| HW   | 418 (238.7)                                                                                         | 517 (12.7) | 548 (4.7)  | 581 (5.2)  | 650 (0.8)  |  | 656, 705                | 6            |
| SW   | 418 (250.4)                                                                                         | 516 (13.6) | 553 (4.1)  | 581 (5.4)  | 650 (0.7)  |  | 656, 705                | 1            |

  

| C    | Absorbance properties $\lambda_{\max}$ (nm) ( $\epsilon \times 10^3 \text{ M}^{-1}\text{cm}^{-1}$ ) |            |            |            |            |  | Fluorescence properties |              |
|------|-----------------------------------------------------------------------------------------------------|------------|------------|------------|------------|--|-------------------------|--------------|
|      | Soret                                                                                               | $Q_y(1-0)$ | $Q_y(0-0)$ | $Q_x(1-0)$ | $Q_x(0-0)$ |  | $\lambda_{\max}$ (nm)   | Stokes shift |
| DEMI | 420 (255.0)                                                                                         | 517 (14.7) | 552 (4.0)  | 584 (5.5)  | 650 (0.8)  |  | 649, 708                | /            |
| HW   | 420 (159.2)                                                                                         | 519 (12.6) | 553 (5.2)  | 588 (4.9)  | 649 (1.4)  |  | 649, 708                | /            |
| SW   | 420 (177.4)                                                                                         | 518 (12.5) | 555 (4.5)  | 587 (4.0)  | 646 (1.4)  |  | 649, 708                | 3            |

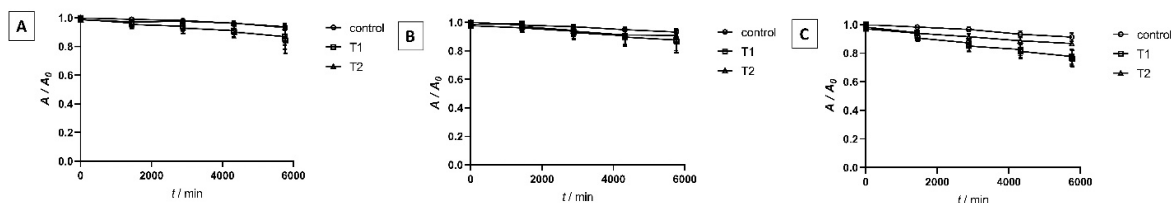

**Figure S1.** Photostability of TMPyP3 in DEMI (A), SW (B) and HW (C) measured by the decrease of Soret band absorption intensity in a 5-day experiment. T1 represents a 10  $\mu$ M PS solution in waters of different hardness irradiated for 10 minutes every 24 h over 5 days (411 nm; total light dose 33 J/cm<sup>2</sup>), while T2 represents samples irradiated for 10 minutes only on the first day of the experiment, and the stability was measured every 24h for 5 days (411 nm; total light dose 6.6 J/cm<sup>2</sup>). Control represents a 10  $\mu$ M solution kept in the dark for 5 days, while absorbance intensity was measured every 24 h. Data represents average of triplicate measurement with error bars presenting standard deviation.

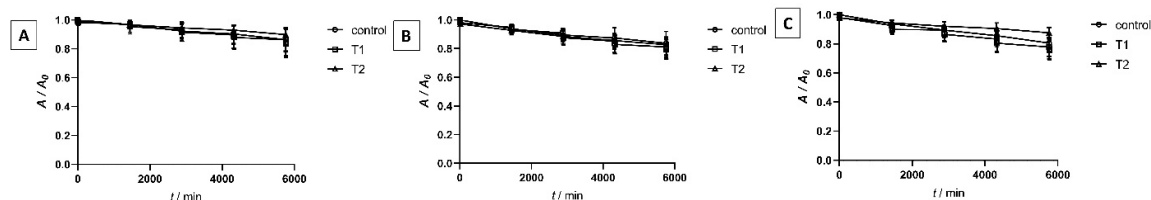

**Figure S2.** Photostability of TMPyP3-CH<sub>3</sub> in DEMI (A), SW (B) and HW (C) measured by the decrease of Soret band absorption intensity in a 5-day experiment. T1 represents a 10  $\mu$ M PS solution in waters of different hardness irradiated for 10 minutes with violet light every 24 h over 5 days (411 nm; total light dose 33 J/cm<sup>2</sup>), while T2 represents samples irradiated for 10 minutes only on the first day of the experiment, and the stability was measured every 24 h for 5 days (411 nm; total light dose 6.6 J/cm<sup>2</sup>). Control represents a 10  $\mu$ M solution kept in the dark for 5 days, while absorbance intensity was measured every 24 h. Data represents average  $\pm$  SD.

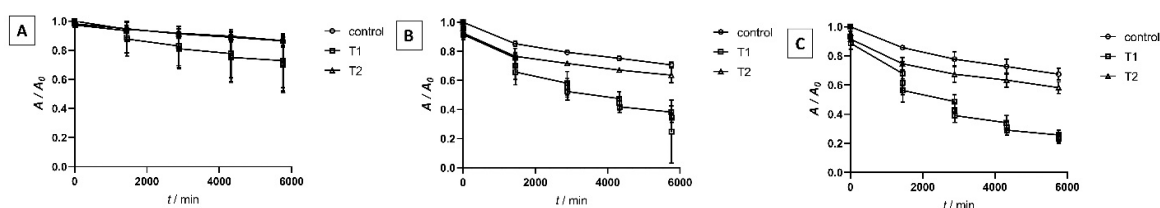

**Figure S3.** Photostability of TMPyP3-C<sub>17</sub>H<sub>35</sub> in DEMI (A), SW (B) and HW (C) measured by the decrease of Soret band absorption intensity in a 5-day experiment. T1 represents a 10  $\mu$ M PS solution in waters of different hardness irradiated for 10 minutes with violet light every 24 h over 5 days (411 nm; total light dose 33 J/cm<sup>2</sup>), while T2 represents samples irradiated for 10 minutes only on the first day of the experiment, and the stability was measured every 24 h for 5 days (411 nm; total light dose 6.6 J/cm<sup>2</sup>). Control represents a 10  $\mu$ M solution kept in the dark for 5 days, while absorbance intensity was measured every 24 h. Data represents average  $\pm$  SD.

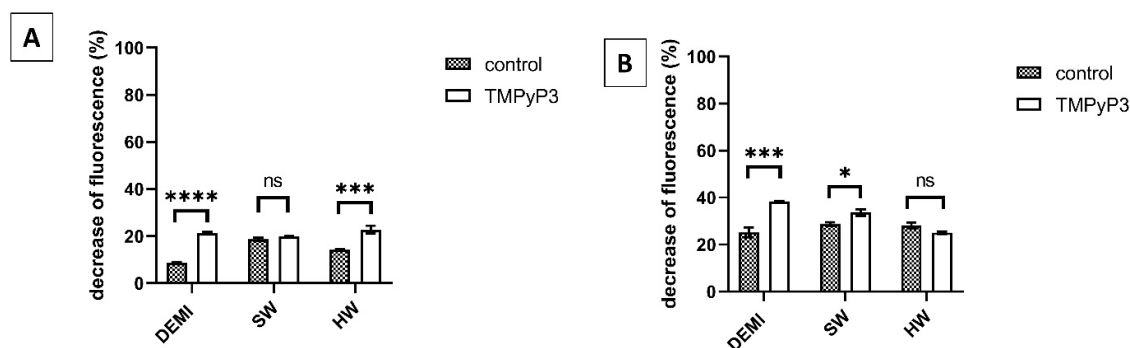

**Figure S4.** Singlet oxygen production of TMPyP3 (1  $\mu$ M) measured by photodegradation of ABMDMA (6  $\mu$ M). For irradiation, a LED-based source of violet light (411 nm) was used with a fluence rate 7 mW/cm<sup>2</sup> (light dose 4.2 J/cm<sup>2</sup>) (A) and 11 mW/cm<sup>2</sup> (light dose 6.6 J/cm<sup>2</sup>) (B). Control represents photodegradation of ABMDMA (6  $\mu$ M) without PS. Data is presented as an average of duplicate measurement  $\pm$  SD; \*\*\*\*  $p < 0.0001$ , \*\*\*  $0.0001 < p < 0.001$ , \*  $0.01 < p < 0.05$ .

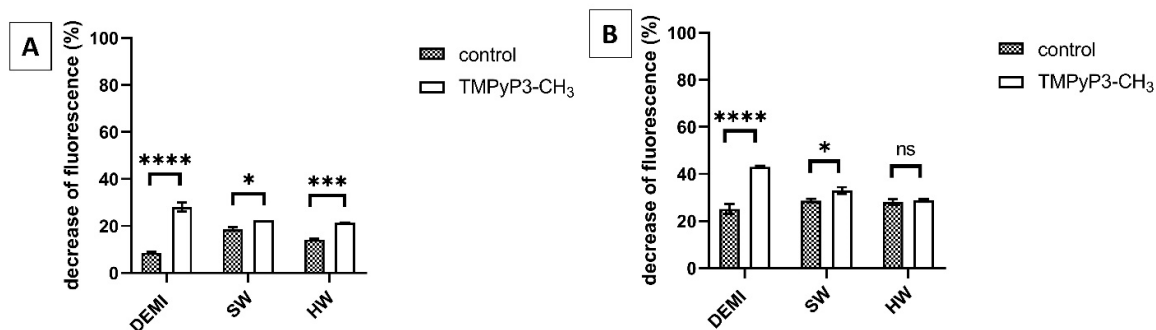

**Figure S5.** Singlet oxygen production of TMPyP3-CH<sub>3</sub> (1  $\mu$ M) measured by photodegradation of ABMDMA (6  $\mu$ M). For irradiation, a LED-based source of violet light (411 nm) was used with a fluence rate 7 mW/cm<sup>2</sup> (light dose 4.2 J/cm<sup>2</sup>) (A) and 11 mW/cm<sup>2</sup> (light dose 6.6 J/cm<sup>2</sup>) (B). Control represents photodegradation of ABMDMA (6  $\mu$ M) without PS. Data is presented as an average of duplicate measurement  $\pm$  SD; \*\*\*\*  $p < 0.0001$ , \*\*\*  $0.0001 < p < 0.001$ , \*  $0.01 < p < 0.05$ .

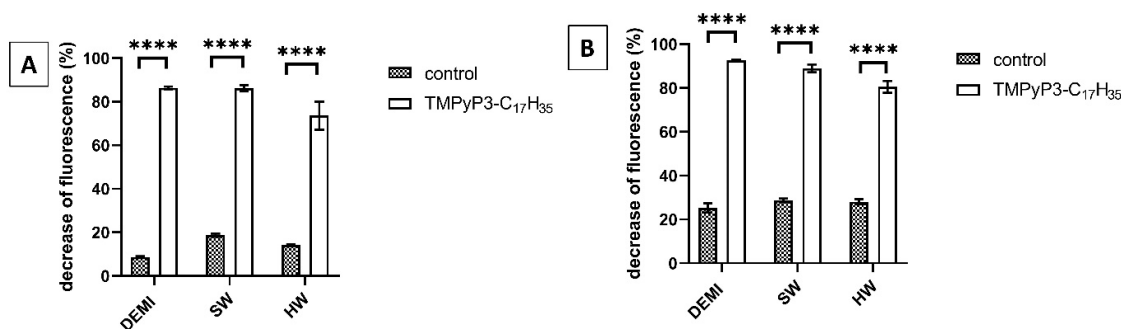

**Figure S6.** Singlet oxygen production of TMPyP3-C<sub>17</sub>H<sub>35</sub> (1  $\mu$ M) measured by photodegradation of ABMDMA (6  $\mu$ M). For irradiation, a LED-based source of violet light (411 nm) was used with a fluence rate 7 mW/cm<sup>2</sup> (light dose 4.2 J/cm<sup>2</sup>) (A) and 11 mW/cm<sup>2</sup> (light dose 6.6 J/cm<sup>2</sup>) (B). Control represents photodegradation of ABMDMA (6  $\mu$ M) without PS. Data is presented as an average of duplicate measurement  $\pm$  SD; \*\*\*\*  $p < 0.0001$ .

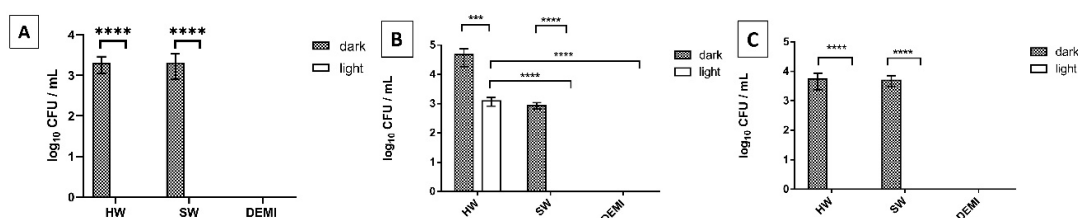

**Figure S7.** Impact of the PDI on the adhesion of *L. pneumophila* on polystyrene using PSs TMPyP3 (A), TMPyP3-CH<sub>3</sub> (B) and TMPyP3-C<sub>17</sub>H<sub>35</sub> (C) in concentration 0.5x MEC in waters of different hardness (DEMI, SW and HW). For irradiation, a LED-based source of violet light was used for 10 min (395 nm, 20 mW/cm<sup>2</sup>, 12 J/cm<sup>2</sup>). Dark control represents the samples tested with PSs without light irradiation. Data is shown as an average  $\pm$  SD; \*\*\*\*  $p < 0.0001$ , \*\*\*  $0.0001 < p < 0.001$ .

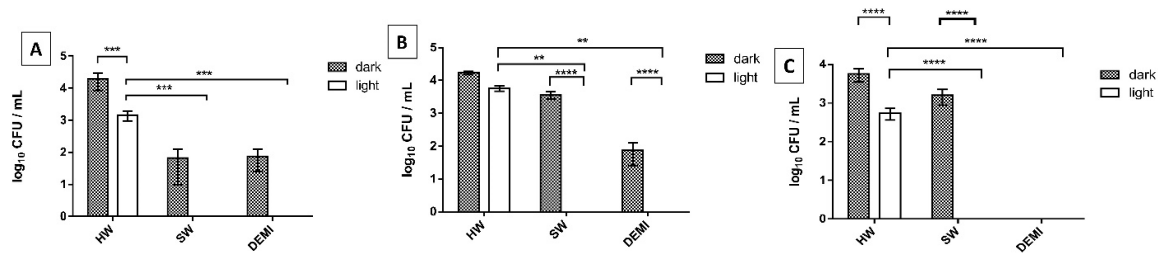

**Figure S8.** Impact of the PDI on the *L. pneumophila* biofilm formation using PSs TMPyP3 (A), TMPyP3-CH<sub>3</sub> (B) and TMPyP3-C<sub>17</sub>H<sub>35</sub> (C) in concentration 0.5x MEC in waters of different hardness (DEMI, SW and HW). For irradiation, a LED-based source of violet light was used for 10 min (395 nm, 20 mW/cm<sup>2</sup>, 12 J/cm<sup>2</sup>). Dark control represents the samples tested with PSs without light irradiation. Data is shown as an average  $\pm$  SD; \*\*\*\* p < 0.0001, \*\*\* 0.0001 < p < 0.001, \*\* 0.001 < p < 0.01.

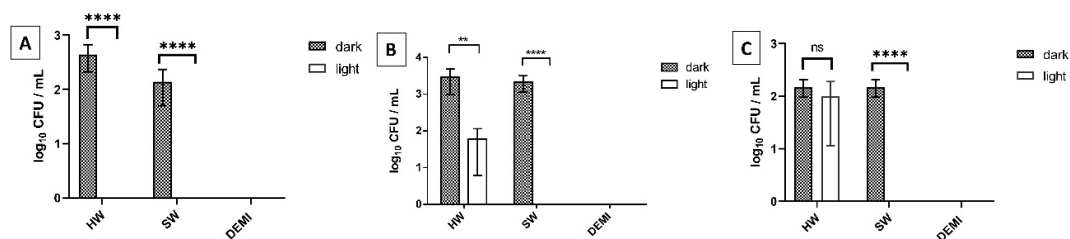

**Figure S9.** Impact of the PDI on the *L. pneumophila* biofilm destruction using PSs TMPyP3 (A), TMPyP3-CH<sub>3</sub> (B) and TMPyP3-C<sub>17</sub>H<sub>35</sub> (C) in concentration 2x MEC in waters of different hardness (DEMI, SW and HW). For irradiation, a LED-based source of violet light was used for 10 min (395 nm, 20 mW/cm<sup>2</sup>, 12 J/cm<sup>2</sup>). Dark control represents the samples tested with PSs without light irradiation. Data is shown as an average  $\pm$  SD; \*\*\*\* p < 0.0001, \*\* 0.001 < p < 0.01.
